# Supplementary material for: Fast hydrogen release under moderate conditions from NaBH4 destabilized by fluorographite
Source: Royal Society of Chemistry journal article supplement (doi:10.1039/c3ra45833d), 2013-11-26
Supplement: c3ra45833d.pdf [file c3ra45833d.pdf]

## *Supplementary information*

### **Fast Hydrogen Release under Moderate Conditions from NaBH<sub>4</sub> Destabilized by Fluorographite**

*Liuting Zhang, Xuezhang Xiao,\* Xiulin Fan, Shouquan Li, Hongwei Ge,  
Qidong Wang and Lixin Chen\**

Key Laboratory of Advanced Materials and Applications for Batteries of Zhejiang Province, Department of Materials Science and Engineering, Zhejiang University, Hangzhou 310027, China

The fluorographite used were purchased from CarFluor Ltd, and some information is given by the manufacturer in Table S1.

**Table S1.** Properties of fluorographite.

| Fluorine content (%) | Density (g/cm <sup>-3</sup> ) | Specific Surface Areas (m <sup>2</sup> /g) | Surface Energy (MJ/m <sup>2</sup> ) | Decomposition Temperature (°C) |
|----------------------|-------------------------------|--------------------------------------------|-------------------------------------|--------------------------------|
| 56~61                | 2.5                           | >340                                       | 7.01                                | 640                            |

**Table S2.** Hydrogen capacities for the samples with different mass ratio of NaBH<sub>4</sub>.

| Sample                     | Mass ratio of NaBH <sub>4</sub> (wt %) | Desorption temperature (°C) | Desorption capacity at 250 °C (wt %) |
|----------------------------|----------------------------------------|-----------------------------|--------------------------------------|
| 45NaBH <sub>4</sub> /55FGi | 45                                     | 130.7                       | 4.2%                                 |
| 55NaBH <sub>4</sub> /45FGi | 55                                     | 125.6                       | 4.8%                                 |
| 65NaBH <sub>4</sub> /35FGi | 65                                     | 129.2                       | 4.3%                                 |
| BM NaBH <sub>4</sub>       | 100                                    | >250                        | ~0                                   |

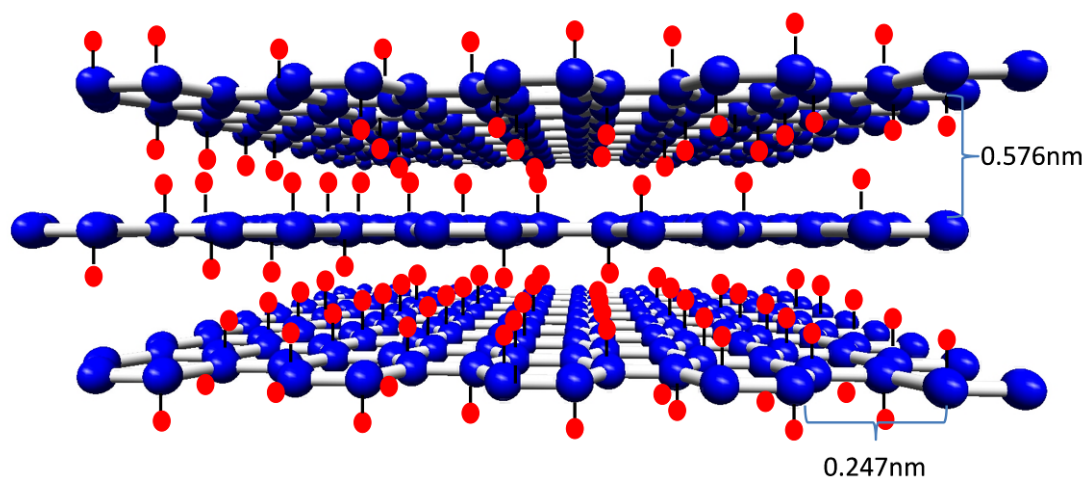

**Fig. S1** Crystal structure diagram of FGi.<sup>S1</sup>

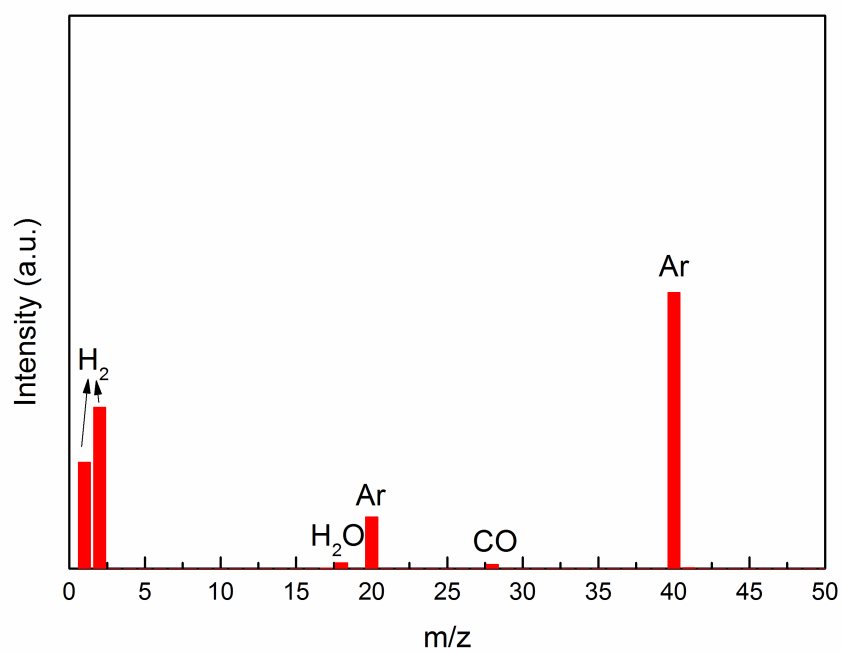

**Fig. S2** MS profile of gas inside the jar after ball milling 55NaBH<sub>4</sub>/45FGi composite for 20h.

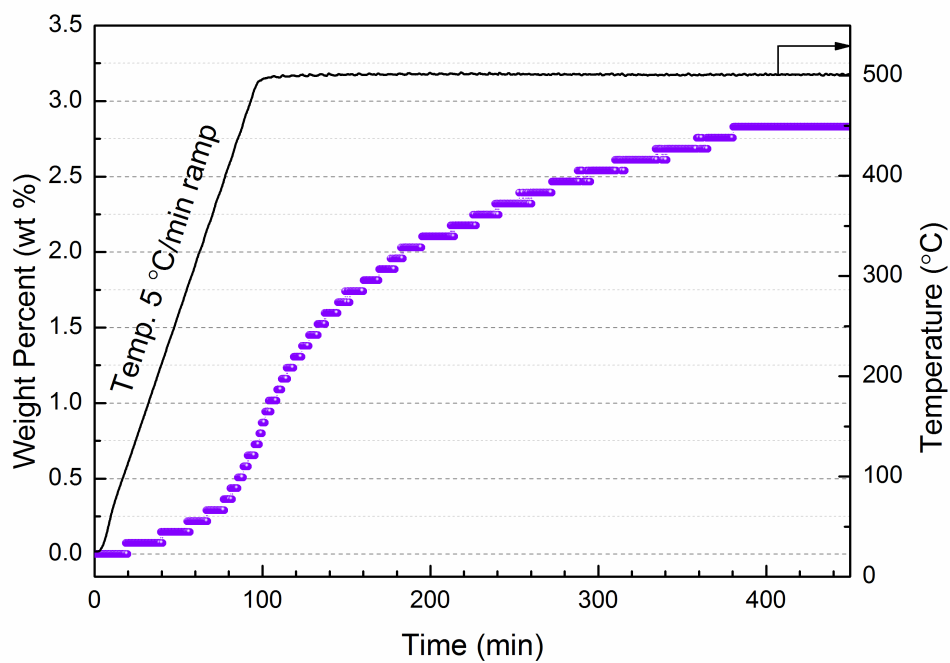

**Fig. S3** Dehydrogenation profile of the rehydrogenated 55NaBH<sub>4</sub>/45FGi composite from room temperature to 500 °C.

(S1) P Kamarchik Jr; JL Margrave. *Acc. Chem. Res.* **1978**, *11*, 296-300.
